# Supplementary material for: At-Home use of App-Based Mindfulness for Children: A Randomized Active-Controlled Trial
Source: Springer Nature journal article supplement (doi:10.1007/s12671-023-02231-3), 2023-10-09
Supplement: MOESM1 [file 26142002]

**Supplementary Materials – Table of Contents**

[Measure validation: CFA](#_Toc139790270)

[Fig. S1](#_Toc139790271)

[Fig. S2](#_Toc139790272)

[Fig. S3](#_Toc139790273)

[Fig. S4](#_Toc139790274)

[Table S1](#_Toc139790275)

[Table S2](#_Toc139790276)

[Table S3](#_Toc139790277)

[Table S4](#_Toc139790278)

[Table S5](#_Toc139790279)

[Table S6](#_Toc139790280)

[References](#_Toc139790282)

# Measure validation: CFA

As we constructed our own measure of negative affect, we conducted a post-hoc confirmatory factor analysis in *lavaan* to identify possible limitations in the measure (Rosseel, 2012). We examined the internal validity of the constructed scale of child negative affect, using responses at baseline. The Negative Affect scale, derived from two proposed factors on thirteen affect items, was upheld. The seven negative affect items had comparable loadings, and the fit was reasonable (CFI=0.921, RMSEA=0.078) (Hu & Bentler, 1999).

# Fig. S1

*Distribution of mindfulness days practiced, collected from Inner Explorer*


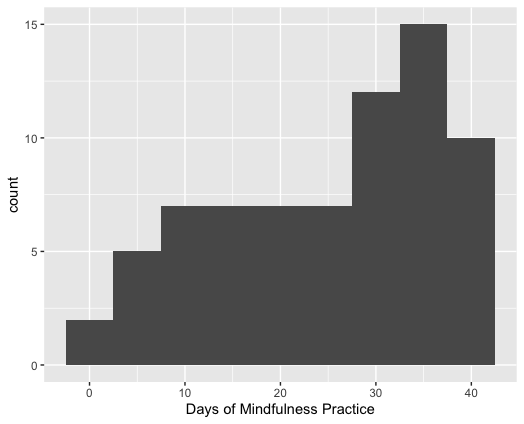


# Fig. S2

*Distribution of mindfulness practices completed, reported by parents*

*
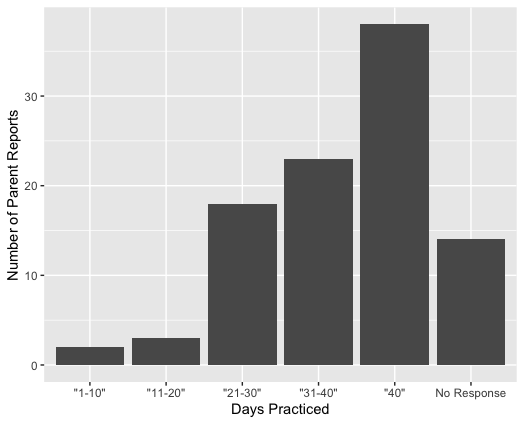
*

Parent Reported Number of Practices

“1-10”: 1 to 10 practices, “11-20”: 11 to 20 days practices, etc. “No response” refers to parents who didn’t report how many days practiced. Sample sizes are 2,2,17,20,34,15 respectively.

# Fig. S3

*Correspondence between Parent Report and objective Inner Explorer metric, dosage*


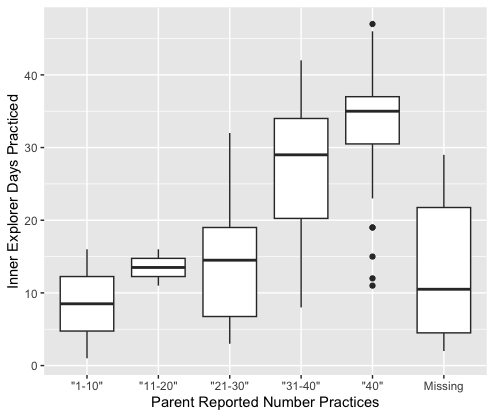


On the x axis, at the end of the study, parents were asked to report how many practices their children completed. On the y axis, we collected days practiced from Inner Explorer (where >1 click on a mindfulness practice during a day counts as a day practiced).

# Fig. S4

*Change in negative affect, by parent-reported number of practices*

*
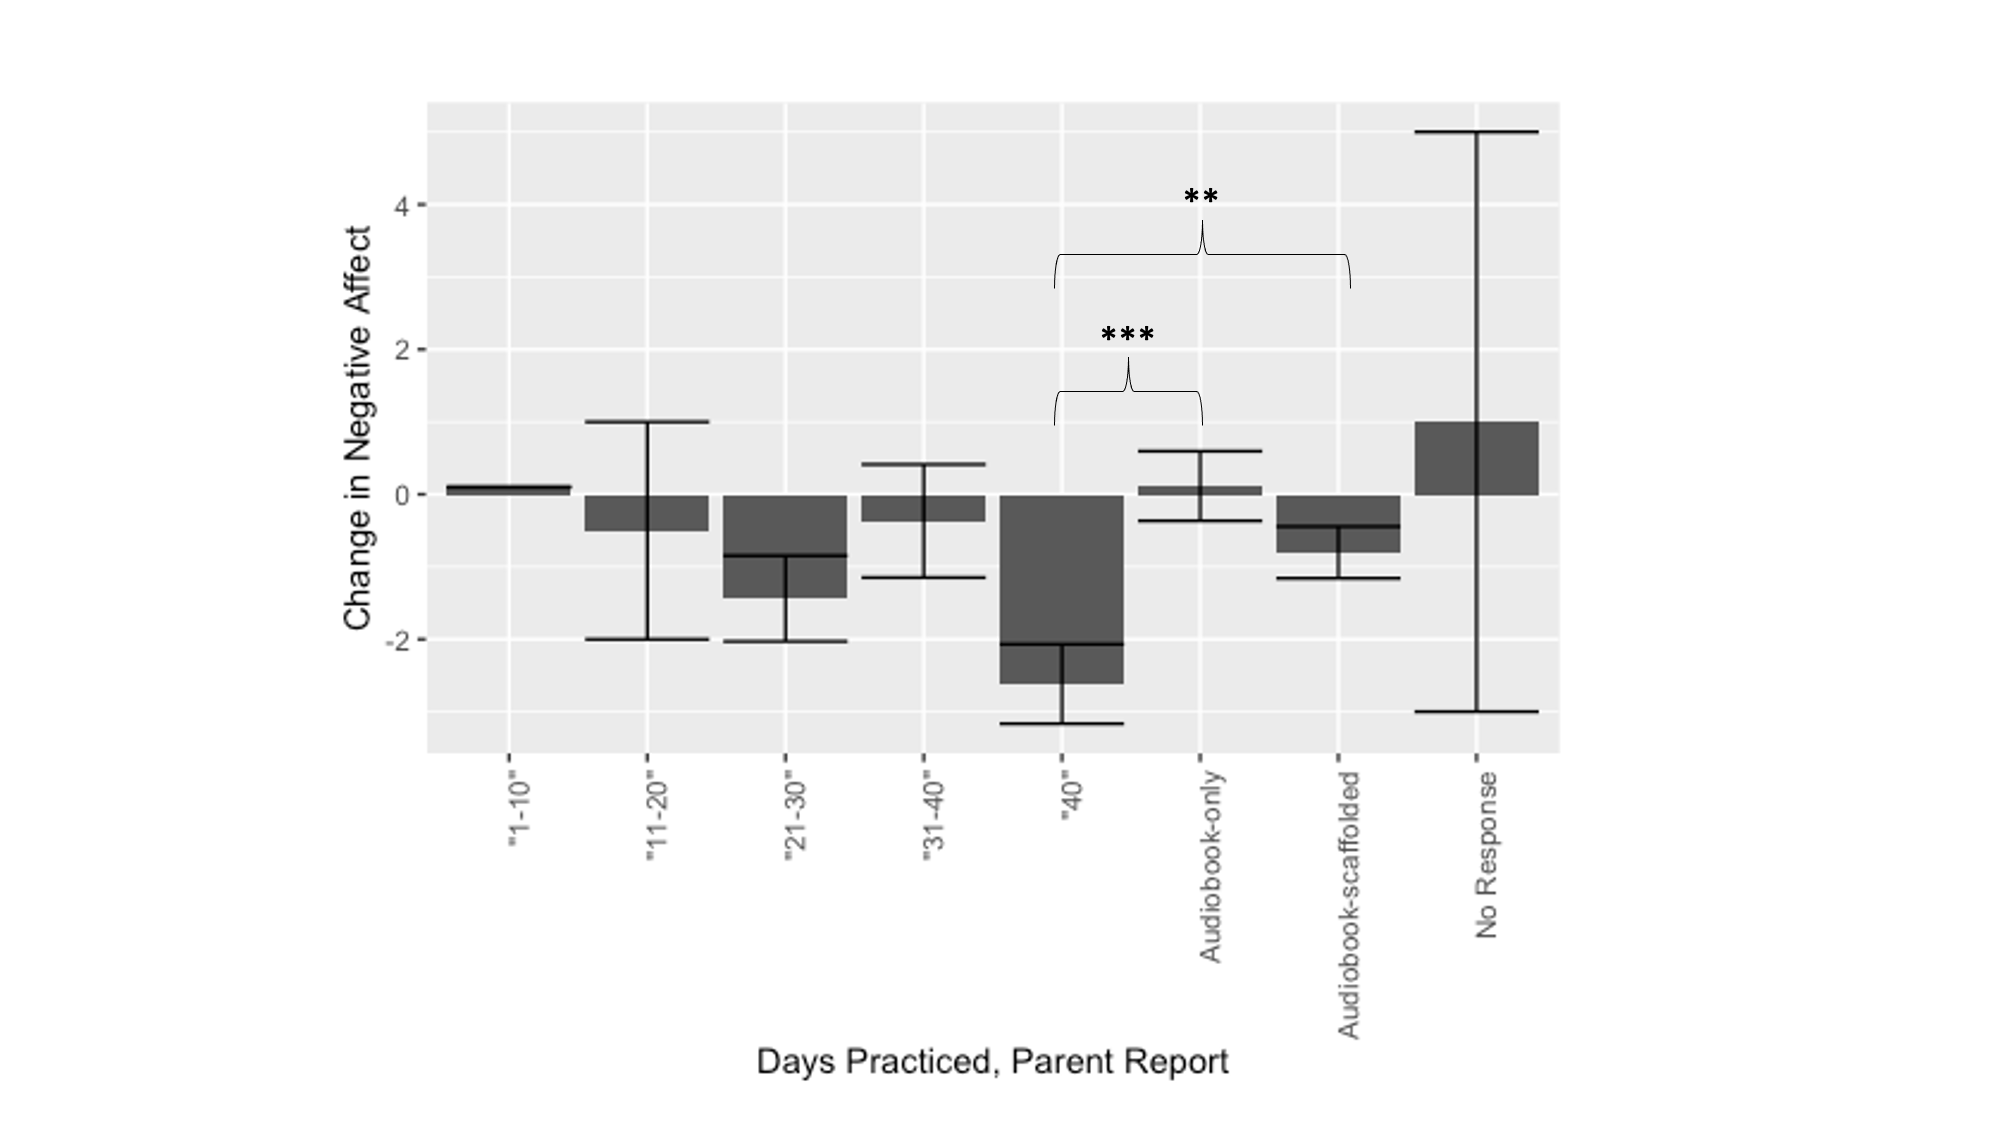
*

Group (by number of mindfulness practices, audiobook group, etc)

**p* < 0.05, ***p* < 0.01, *** p < 0.001

“1-10”: 1 to 10 completed practices, “11-20”: 11 to 20 completed practices, etc. “No response” refers to parents who didn’t report how many days practiced. Error bars reflect standard errors. Sample sizes are 2,2,17,20,34,90,99,15 respectively.

# Table S1

*Cross-measure correlations at baseline*

|  | Negative Affect CR | Mindfulness | | Stress Children | Internalizing CR | | Anxiety CR | | Depression CR | | GEC | | BRI | Anxiety PR | Depression PR | | Stress Parent | | | Prosociality | | |
| --- | --- | --- | --- | --- | --- | --- | --- | --- | --- | --- | --- | --- | --- | --- | --- | --- | --- | --- | --- | --- | --- | --- |
| Negative Affect CR |  |  | |  |  | |  | |  | |  | |  |  |  | |  | | |  | | |
| Mindfulness | -0.34**** |  | |  |  | |  | |  | |  | |  |  |  | |  | | |  | | |
| Stress Children | 0.44**** | -0.36**** | |  |  | |  | |  | |  | |  |  |  | |  | | |  | | |
| Internalizing CR | 0.49**** | -0.55**** | | 0.55**** |  | |  | |  | |  | |  |  |  | |  | | |  | | |
| Anxiety CR | 0.45**** | -0.53**** | | 0.47**** | 0.92**** | |  | |  | |  | |  |  |  | |  | | |  | | |
| Depression CR | 0.43**** | -0.43**** | | 0.50**** | 0.83**** | | 0.56**** | |  | |  | |  |  |  | |  | | |  | | |
| GEC | 0.15* | -0.01 | | 0.21*** | 0.17** | | 0.12 | | 0.23*** | |  | |  |  |  | |  | | |  | | |
| BRI | 0.15* | 0.03 | | 0.17** | 0.13* | | 0.08 | | 0.19** | | 0.90**** | |  |  |  | |  | | |  | | |
| Anxiety PR | 0.14* | 0.01 | | 0.14* | 0.17** | | 0.19** | | 0.13* | | 0.34**** | | 0.40**** |  |  | |  | | |  | | |
| Depression PR | | 0.11 | 0.04 | 0.12 | | 0.06 | 0.02 | | 0.13* | | 0.54**** | | 0.52**** | | 0.55**** | |  |  | | |  | | |
| Stress Parent | | 0.00 | 0.08 | 0.20** | | 0.09 | 0.04 | | 0.14* | | 0.37**** | | 0.37**** | | 0.26**** | | 0.41**** | | |  | |  | | |
| Prosociality | | -0.03 | -0.06 | -0.04 | | 0.02 | 0.09 | | -0.10 | | -0.44**** | | -0.41**** | | -0.03 | | -0.27**** | | -0.17** | | | |  | |
| Negative Affect PR | | 0.13* | 0.12* | 0.16** | | -0.04 | -0.04 | | 0.00 | | 0.52**** | | 0.55**** | | 0.42**** | | 0.55**** | | 0.43**** | | | | -0.36**** | |

*****p* < .0001, ****p* < .001, ***p* < .01, **p* < .05

CR: Child Report; PR: Parent Report; Mindfulness: Child and Adolescent Mindfulness Measure (CAMM); Stress Children: Perceived Stress Scale for Children; Anxiety CR: RCADS – Anxiety Scale; Depression CR: RCADS – Depression Scale; GEC: BRIEF Global Executive Composite; BRI: BRIEF Behavioral Regulation Index; Anxiety PR: RCADS – Anxiety Scale; Depression PR: RCADS –Depression Scale; Stress Parent: Perceived Stress Scale; Prosociality: Parent Report Prosociality

Correlations were conducted on the full sample of 279 participants.

# Table S2

*ANOVA Results – Effects of Time*

| Outcomes | P Value Time | FDR-corrected P Value Time |
| --- | --- | --- |
| Negative Affect CR | 0.00600** | 0.0180* |
| Mindfulness | 0.305 | 0.305 |
| Stress Children | 0.0450* | 0.0771 |
| Anxiety CR | 0.144 | 0.157 |
| Depression CR | 0.101 | 0.121 |
| GEC | 0.00300** | 0.0120* |
| BRI | 0.000417*** | 0.00500** |
| Anxiety PR | 0.0640 | 0.0960 |
| Depression PR | 0.0110* | 0.0220* |
| Stress Parent | 0.00900** | 0.0216* |
| Prosociality | 0.0950 | 0.121 |
| Negative Affect PR | 0.000934*** | 0.00560** |

* *p* < 0.05, ** p < 0.01, *** p < 0.001

*Note:* CR: Child Report; PR: Parent Report; Negative Affect CR: Child Negative Affect; Mindfulness: Child and Adolescent Mindfulness Measure (CAMM); Stress Children: Perceived Stress Scale for Children; Anxiety CR: RCADS – Anxiety Scale; Depression CR: RCADS – Depression Scale; GEC: BRIEF Global Executive Composite; BRI: BRIEF Behavioral Regulation Index; Anxiety PR: RCADS – Anxiety Scale; Depression PR: RCADS –Depression Scale; Stress Parent: Perceived Stress Scale; Prosociality: Parent Report Prosociality, Negative Affect PR: Parent Report of Child Negative Affect

# Table S3

*Treatment effects – main ANCOVA results*

|  | **Mind vs Aud.** | | | **Mind vs Aud. + S.** | | |
| --- | --- | --- | --- | --- | --- | --- |
| Outcomes | Group B Aud. | P Aud. | FDR P Aud. | Group B Aud.+S. | P Aud.+S. | FDR P Aud.+S. |
| Negative Affect CR | -0.012 | 0.987 | 0.987 | 0.532 | 0.449 | 0.963 |
| Mindfulness | -0.377 | 0.696 | 0.987 | -0.282 | 0.767 | 0.963 |
| Stress Children | 0.815 | 0.278 | 0.987 | 0.791 | 0.271 | 0.963 |
| Anxiety CR | 0.608 | 0.516 | 0.987 | 0.339 | 0.712 | 0.963 |
| Depression CR | 0.364 | 0.737 | 0.987 | -0.062 | 0.953 | 0.963 |
| GEC | -0.034 | 0.971 | 0.987 | 0.06 | 0.949 | 0.963 |
| BRI | -0.548 | 0.568 | 0.987 | -0.044 | 0.963 | 0.963 |
| Anxiety PR | 0.226 | 0.832 | 0.987 | 0.83 | 0.410 | 0.963 |
| Depression PR | 0.289 | 0.817 | 0.987 | 0.611 | 0.607 | 0.963 |
| Stress Parent | 0.627 | 0.452 | 0.987 | -0.382 | 0.637 | 0.963 |
| Prosociality | 0.367 | 0.149 | 0.894 | 0.113 | 0.651 | 0.963 |
| Negative Affect PR | 1.325 | 0.011* | 0.132 | 0.421 | 0.399 | 0.963 |

* *p* < 0.05, ** p < 0.01, *** p < 0.001

*Note:* Aud. + S. = Audiobook + Scaffolding Condition; Aud. = Audiobook Only Condition; Mind. = Mindfulness Condition; CR: Child Report; PR: Parent Report; Negative Affect CR: Child Negative Affect; Mindfulness: Child and Adolescent Mindfulness Measure (CAMM); Stress Children: Perceived Stress Scale for Children; Anxiety CR: RCADS – Anxiety Scale; Depression CR: RCADS – Depression Scale; GEC: BRIEF Global Executive Composite; BRI: BRIEF Behavioral Regulation Index; Anxiety PR: RCADS – Anxiety Scale; Depression PR: RCADS –Depression Scale; Stress Parent: Perceived Stress Scale; Prosociality: Parent Report Prosociality, Negative Affect PR: Parent Report of Child Negative Affect

# Table S4

*Treatment effects with demographics covarying in ANCOVA models.*

|  | **Mind vs Aud.** | | | | | | **Mind vs Aud. + S.** | | | | |
| --- | --- | --- | --- | --- | --- | --- | --- | --- | --- | --- | --- |
| Outcomes | Group B Aud. | | P Aud. | | FDR P Aud. | | Group B Aud. + S. | P Aud. + S. | | FDR P Aud. + S. | |
| Negative Affect CR | -0.232 | | 0.749 | | 0.983 | | 0.423 | 0.548 | | 0.957 | |
| Mindfulness | -0.092 | | 0.925 | | 0.983 | | -0.052 | 0.957 | | 0.957 | |
| Stress Children | 0.874 | | 0.246 | | 0.983 | | 0.941 | 0.201 | | 0.957 | |
| Anxiety CR | 0.301 | | 0.749 | | 0.983 | | 0.081 | 0.93 | | 0.957 | |
| Depression CR | 0.05 | | 0.964 | | 0.983 | | -0.268 | 0.804 | | 0.957 | |
| GEC | -0.02 | | 0.983 | | 0.983 | | 0.06 | 0.948 | | 0.957 | |
| BRI | -0.573 | | 0.56 | | 0.983 | | -0.096 | 0.919 | | 0.957 | |
| Anxiety PR | 0.274 | 0.800 | | 0.983 | | 0.74 | | | 0.469 | 0.957 |
| Depression PR | 0.377 | 0.764 | | 0.983 | | 0.573 | | | 0.632 | 0.957 |
| Stress Parent | 0.618 | 0.467 | | 0.983 | | -0.361 | | | 0.663 | 0.957 |
| Prosociality | 0.281 | 0.263 | | 0.983 | | 0.03 | | | 0.903 | 0.957 |
| Negative Affect PR | 1.44 | 0.006** | | 0.072 | | 0.496 | | | 0.326 | 0.957 |

* *p* < 0.05, ** p < 0.01, *** p < 0.001

*Note:* Aud. + S. = Audiobook + Scaffolding Condition; Aud. = Audiobook Only Condition; Mind. = Mindfulness Condition; CR: Child Report; PR: Parent Report; Negative Affect CR: Child Negative Affect; Mindfulness: Child and Adolescent Mindfulness Measure (CAMM); Stress Children: Perceived Stress Scale for Children; Anxiety CR: RCADS – Anxiety Scale; Depression CR: RCADS – Depression Scale; GEC: BRIEF Global Executive Composite; BRI: BRIEF Behavioral Regulation Index; Anxiety PR: RCADS – Anxiety Scale; Depression PR: RCADS –Depression Scale; Stress Parent: Perceived Stress Scale; Prosociality: Parent Report Prosociality, Negative Affect PR: Parent Report of Child Negative Affect

# Table S5

*Treatment effects with moderation by demographics in ANCOVA, for child perceived stress*

| Moderators | Group X Baseline B Aud. | P Aud. | FDR P Aud. | Group X Baseline B Aud.+S. | P Aud.+S. | FDR P Aud.+S. |
| --- | --- | --- | --- | --- | --- | --- |
| Child.Gender | 0.919 | 0.421 | 0.485 | 1.247 | 0.249 | 0.383 |
| Child.Mental.Health.Dx | 0.93 | 0.288 | 0.403 | 0.458 | 0.588 | 0.706 |
| WhiteOrNot | 1.608 | 0.256 | 0.403 | 1.745 | 0.206 | 0.383 |
| IncomeGreater | 2.372 | 0.106 | 0.403 | 2.711 | 0.067 | 0.383 |
| Educated | 0.762 | 0.485 | 0.485 | 0.089 | 0.933 | 0.933 |
| Older | 1.258 | 0.228 | 0.403 | 1.184 | 0.255 | 0.383 |
| SpanishOrNot | 1.08 | 0.158 | 0.403 | 0.924 | 0.223 | 0.357 |

Demographic variables are binarized. Child Gender: Male or Female (reported by parent). Child Mental Health Dx.: whether or not a child has a diagnosis of ADHD or anxiety. WhiteOrNot: White or non-white. IncomeGreater: household income greater than 80k. Educated: Maternal Education consisting of masters or above. Older: child age greater than median age (9 years 5 months), SpanishOrNot: parent language spoken, Spanish (1) or English (0).

# Table S6

*Treatment effects with moderation by demographics in ANCOVA, for child anxiety*

| Outcomes | Group X Baseline B Aud. | P Aud. | FDR P Aud. | Group X Baseline B Aud.+S. | P Aud.+S. | FDR P Aud.+S. |
| --- | --- | --- | --- | --- | --- | --- |
| Child.Gender | 1.336 | 0.349 | 0.611 | 1.462 | 0.281 | 0.550 |
| Child.Mental.Health.Dx | 0.681 | 0.534 | 0.748 | 0.922 | 0.393 | 0.550 |
| WhiteOrNot | 2.854 | 0.108 | 0.410 | 1.687 | 0.336 | 0.550 |
| IncomeGreater | 0.178 | 0.924 | 0.924 | 2.067 | 0.267 | 0.550 |
| Educated | 0.134 | 0.92 | 0.924 | 0.523 | 0.688 | 0.785 |
| Older | 2.056 | 0.117 | 0.410 | 1.798 | 0.172 | 0.550 |
| SpanishOrNot | 1.037 | 0.285 | 0.611 | 0.263 | 0.785 | 0.785 |

Demographic variables are binarized. Child Gender: Male or Female (reported by parent). Child Mental Health Dx.: whether or not a child has a diagnosis of ADHD or anxiety. WhiteOrNot:White or non-white. IncomeGreater: household income greater than 80k. Educated: Maternal Education consisting of masters or above. Older: child age greater than median age (9 years 5 months). SpanishOrNot: parent language spoken, Spanish (1) or English (0).

# References

Hu, L. T., & Bentler, P. M. (1999). Cutoff criteria for fit indexes in covariance structure analysis: Conventional criteria versus new alternatives. *Structural equation modeling: a multidisciplinary journal*, *6*(1), 1-55.

Rosseel, Y. (2012). lavaan: An R package for structural equation modeling. *Journal of Statistical*

*Software*, *48(2),* 1-3.
